# Supplementary material for: Flexibility transition and guest-driven reconstruction in a ferroelastic metal–organic framework
Source: PubMed Central journal article supplement (PMC4304274; doi:10.1039/c4ce01572j), 2014-10-02
Supplement: CE-017-C4CE01572J-s001.pdf [file CE-017-C4CE01572J-s001.pdf]

# Flexibility Transition and Guest-Driven Reconstruction in a Ferroelastic Metal–Organic Framework

## SUPPLEMENTARY INFORMATION

Sarah J. Hunt, Matthew J. Cliffe, Joshua A. Hill, Andrew B. Cairns,  
Nicholas P. Funnell, and Andrew L. Goodwin\*

Department of Chemistry, University of Oxford, Inorganic Chemistry Laboratory,  
South Parks Road, Oxford OX1 3QR, U.K.

\*To whom correspondence should be addressed; e-mail: [andrew.goodwin@chem.ox.ac.uk](mailto:andrew.goodwin@chem.ox.ac.uk).

**Submitted to CrystEngComm**

## 1 Single-crystal X-ray structural parameters

**Table S1:** Structural parameters for [Cu(MeCN)(tcm)] as determined by refinement against single-crystal X-ray diffraction data collected at 100 K. Space group: *Pbca*. Lattice parameters:  $a = 12.9802(3)$  Å,  $b = 8.14490(18)$  Å,  $c = 14.5848(3)$  Å. Estimated standard errors are given in parentheses.

| Atom | <i>x</i>     | <i>y</i>    | <i>z</i>     | $U_{\text{eq}}$ (Å <sup>2</sup> ) |
|------|--------------|-------------|--------------|-----------------------------------|
| Cu   | 0.588127(13) | 0.44049(2)  | 0.628675(12) | 0.0136                            |
| C11  | 0.69527(9)   | 0.32962(15) | 0.81154(8)   | 0.0159                            |
| C12  | 0.86036(9)   | 0.32301(15) | 0.88643(8)   | 0.0148                            |
| C13  | 0.70950(9)   | 0.20812(15) | 0.96428(8)   | 0.0141                            |
| C14  | 0.75490(9)   | 0.28398(16) | 0.88784(8)   | 0.0151                            |
| C21  | 0.59224(10)  | 0.82529(18) | 0.64049(9)   | 0.0210                            |
| C22  | 0.59681(13)  | 1.00325(18) | 0.65007(12)  | 0.0312                            |
| N11  | 0.64984(8)   | 0.36967(15) | 0.74738(7)   | 0.0193                            |
| N12  | 0.94616(8)   | 0.35831(15) | 0.88161(7)   | 0.0176                            |
| N13  | 0.67102(8)   | 0.14601(14) | 1.02642(7)   | 0.0169                            |
| N21  | 0.58913(9)   | 0.68611(16) | 0.63311(8)   | 0.0212                            |
| H221 | 0.5567       | 1.0371      | 0.7002       | 0.0491                            |
| H222 | 0.6655       | 1.0361      | 0.6569       | 0.0502                            |
| H223 | 0.5733       | 1.0534      | 0.5950       | 0.0478                            |

## 2 Variable-temperature lattice parameters

**Table S2:** Variable-temperature lattice parameters for Cu(tcm) as determined using powder X-ray diffraction. The estimated thermal stability is  $\sigma T = 0.1$  K in each case and all other estimated standard errors are given in parentheses.

| $T$ (K) | $a$ (Å)     | $b$ (Å)   | $\frac{1}{2}(a + b)$ (Å) | $c$ (Å)    |
|---------|-------------|-----------|--------------------------|------------|
| 20      | 9.314(3)    | 11.916(4) | 10.615(3)                | 9.087(2)   |
| 30      | 9.321(3)    | 11.907(5) | 10.614(3)                | 9.084(3)   |
| 40      | 9.340(3)    | 11.887(5) | 10.614(3)                | 9.085(3)   |
| 50      | 9.364(3)    | 11.874(5) | 10.619(3)                | 9.084(3)   |
| 60      | 9.381(3)    | 11.863(5) | 10.622(3)                | 9.083(3)   |
| 70      | 9.424(3)    | 11.828(5) | 10.626(3)                | 9.084(2)   |
| 80      | 9.455(3)    | 11.789(5) | 10.622(3)                | 9.078(3)   |
| 90      | 9.487(3)    | 11.756(5) | 10.622(3)                | 9.075(2)   |
| 100     | 9.518(3)    | 11.729(5) | 10.624(3)                | 9.072(2)   |
| 110     | 9.555(3)    | 11.706(5) | 10.630(3)                | 9.070(2)   |
| 120     | 9.582(3)    | 11.685(6) | 10.633(3)                | 9.066(2)   |
| 130     | 9.604(4)    | 11.674(6) | 10.639(3)                | 9.063(2)   |
| 140     | 9.626(4)    | 11.668(6) | 10.647(4)                | 9.057(2)   |
| 150     | 9.640(4)    | 11.650(7) | 10.645(4)                | 9.057(2)   |
| 160     | 9.739(4)    | 11.567(7) | 10.653(4)                | 9.0509(19) |
| 170     | 9.776(5)    | 11.539(8) | 10.658(4)                | 9.0488(18) |
| 180     | 9.860(4)    | 11.447(6) | 10.653(4)                | 9.0487(18) |
| 190     | 9.944(4)    | 11.364(6) | 10.654(4)                | 9.0548(14) |
| 200     | 10.014(3)   | 11.301(5) | 10.658(3)                | 9.0556(17) |
| 210     | 10.124(3)   | 11.188(4) | 10.656(2)                | 9.0534(16) |
| 220     | 10.251(3)   | 11.050(4) | 10.651(2)                | 9.0477(14) |
| 230     | 10.348(3)   | 10.970(3) | 10.659(2)                | 9.0489(13) |
| 240     | 10.466(4)   | 10.859(4) | 10.663(3)                | 9.0499(15) |
| 250     | 10.6658(16) | -         | -                        | 9.0520(13) |

Continued on next page

**Table S2 – continued from previous page**

| $T$ (K) | $a$ (Å)     | $b$ (Å) | $\frac{1}{2}(a + b)$ (Å) | $c$ (Å)    |
|---------|-------------|---------|--------------------------|------------|
| 260     | 10.6700(16) | -       | -                        | 9.0476(13) |
| 270     | 10.6698(15) | -       | -                        | 9.0464(12) |
| 280     | 10.6693(15) | -       | -                        | 9.0441(12) |
| 290     | 10.6721(15) | -       | -                        | 9.0416(12) |
| 300     | 10.6727(15) | -       | -                        | 9.0425(12) |
